# Supplementary material for: Highly ordered supermicroporous aluminosilicates with cubic Pm3n symmetry fabricated in weakly acidic solution
Source: Royal Society of Chemistry journal article supplement (doi:10.1039/c3ra43022g), 2013-01-01
Supplement: c3ra43022g.pdf [file c3ra43022g.pdf]

**Electronic Supplementary Information**

**Highly Ordered Supermicroporous Aluminosilicates with Cubic  $Pm\bar{3}n$  Symmetry**

**Fabricated in Weakly Acidic Solution**

Wen Hua Fu, Yi Meng Wang \*, Ming Yuan He

*Shanghai Key Lab of Green Chemistry and Chemical Processes, Department of  
Chemistry, East China Normal University, Shanghai 200062, PR China; Tel:  
0086-21-62232251; fax: 0086-21-62232251; E-mail: ymwang@chem.ecnu.edu.cn*

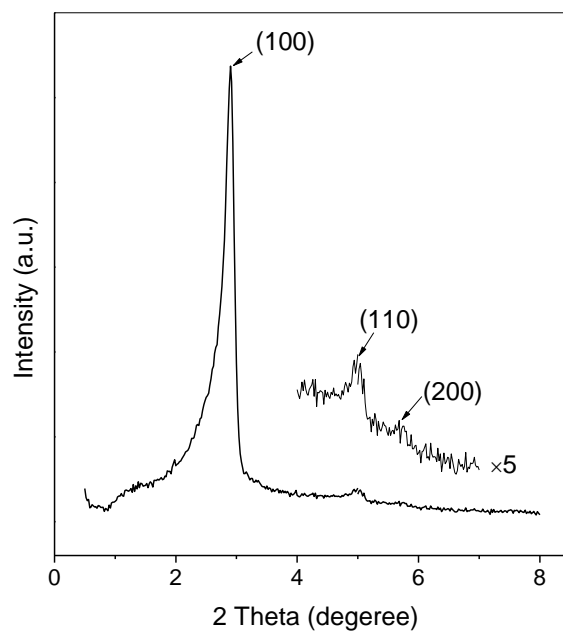

**Figure S1** XRD pattern of as-made silica prepared with the aid of adipic acid.

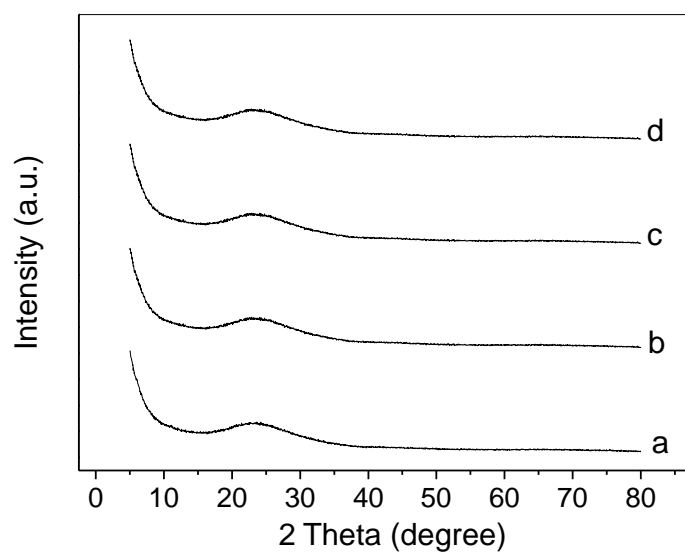

**Figure S2** Wide-angle XRD patterns of aluminosilicates: (a) AS-50-SA-D, (b) AS-50-MA-D, (c) AS-40-SA-P and (d) AS-40-MA-P.

**Table S1** Summary of the auxiliary, preparation approach and molar ratio of  $\text{SiO}_2/\text{Al}_2\text{O}_3$  of the aluminosilicates.

|                   | auxiliary     | approach | $\text{SiO}_2/\text{Al}_2\text{O}_3$ |               |
|-------------------|---------------|----------|--------------------------------------|---------------|
|                   |               |          | raw                                  | Product (ICP) |
| <b>AS-80-SA-D</b> | succinic acid | direct   | 80                                   | 57            |
| <b>AS-60-SA-D</b> | succinic acid | direct   | 60                                   | 54            |
| <b>AS-50-SA-D</b> | succinic acid | direct   | 50                                   | 47            |
| <b>AS-40-SA-D</b> | succinic acid | direct   | 40                                   | 35            |
| <b>AS-50-MA-D</b> | malonic acid  | direct   | 50                                   | 437           |
| <b>AS-80-SA-P</b> | succinic acid | post     | 80                                   | 102           |
| <b>AS-60-SA-P</b> | succinic acid | post     | 60                                   | 75            |
| <b>AS-50-SA-P</b> | succinic acid | post     | 50                                   | 60            |
| <b>AS-40-SA-P</b> | succinic acid | post     | 40                                   | 45            |
| <b>AS-80-MA-P</b> | malonic acid  | post     | 80                                   | 97            |
| <b>AS-60-MA-P</b> | malonic acid  | post     | 60                                   | 67            |
| <b>AS-50-MA-P</b> | malonic acid  | post     | 50                                   | 63            |
| <b>AS-40-MA-P</b> | malonic acid  | post     | 40                                   | 50            |
